# Supplementary material for: Role of Rho/MRTF in Aggressive Vemurafenib-Resistant Murine Melanomas and Immune Checkpoint Upregulation
Source: MDPI journal article supplement (doi:10.3390/ijms241813785), 2023-09-07
Supplement: s1 [file s1]

**Supplementary Table S1: Response of different YUMM cells to vemurafenib treatment.**

|                  |                                                                                                                   | IC <sub>50</sub> of Vemurafenib (μM) |      |              |
|------------------|-------------------------------------------------------------------------------------------------------------------|--------------------------------------|------|--------------|
| Cell line name   | Genotype                                                                                                          | P                                    | R    | Fold change* |
| <b>YUMM1.7</b>   | <i>Braf</i> <sup>V600E/wt</sup> <i>Pten</i> <sup>-/-</sup> <i>Cdkn2</i> <sup>-/-</sup>                            | 0.4                                  | 10   | 33 ± 6.7     |
| <b>YUMMER</b>    | <i>Braf</i> <sup>V600E/wt</sup> <i>Pten</i> <sup>-/-</sup> <i>Cdkn2</i> <sup>-/-</sup>                            | 0.2                                  | 5.1  | 23 ± 5.7     |
| <b>YUMM3.3</b>   | <i>Braf</i> <sup>V600E/wt</sup> <i>Cdkn2</i> <sup>-/-</sup>                                                       | 0.7                                  | 5.7  | 8.0 ± 3.4    |
| <b>YUMM5.2</b>   | <i>Braf</i> <sup>V600E/wt</sup> <i>P53</i> <sup>-/-</sup>                                                         | 2.8                                  | 14.4 | 5.0 ± 1.0    |
| <b>YUMM1G.1</b>  | <i>Braf</i> <sup>V600E/wt</sup> <i>Pten</i> <sup>-/-</sup> <i>Cdkn2</i> <sup>-/-</sup> <i>Mcl1</i> <sup>e/e</sup> | 1.9                                  | 1.8  | -            |
| <b>YUMM4.1**</b> | <i>Pten</i> <sup>-/-</sup> <i>Cdkn2</i> <sup>-/-</sup>                                                            | 34                                   | 34   | -            |

P, Parental; R, Resistant

\*, Fold change is the mean of change in IC<sub>50</sub> of the biological replicates

\*\*, BRAF<sup>WT</sup>

**Supplementary Table S2 Fitted inhibition curve parameter values for Vemurafenib with varying concentrations of CCG-25708.** Non-linear least squares fitted parameters for Vemurafenib concentration response curves in the presence of CCG-257081 are shown. The data were fitted in Graph Pad Prism 9.0 to a three-parameter model (i.e., Hill slope constrained to 1.0) with Bottom values constrained to be  $\geq 0$ .

|                  | [CCG-257081]<br>Parameter | 0 $\mu$ M | 0.45 $\mu$ M | 0.9 $\mu$ M | 1.8 $\mu$ M | 3.75 $\mu$ M | 7.5 $\mu$ M | 15 $\mu$ M |
|------------------|---------------------------|-----------|--------------|-------------|-------------|--------------|-------------|------------|
| <b>YUMM1.7_P</b> | Bottom                    | 0.47      | 0.51         | 0.53        | 0.55        | 0.48         | 0.23        | 0.11       |
|                  | Top                       | 1.09      | 1.13         | 1.12        | 1.13        | 0.96         | 0.79        | 0.63       |
|                  | LogIC50                   | -6.46     | -6.74        | -6.67       | -6.88       | -6.40        | -5.81       | -5.59      |
|                  | IC50                      | 3.47E-07  | 1.83E-07     | 2.15E-07    | 1.31E-07    | 4.02E-07     | 1.54E-06    | 2.57E-06   |
|                  | Span                      | 0.62      | 0.62         | 0.60        | 0.58        | 0.48         | 0.56        | 0.52       |
| <b>YUMM1.7_R</b> | Bottom                    | 0.00      | 0.00         | 0.00        | 0.00        | 0.00         | 0.29        | 0.47       |
|                  | Top                       | 1.06      | 1.02         | 1.05        | 1.01        | 0.91         | 0.72        | 0.62       |
|                  | LogIC50                   | -4.61     | -5.05        | -4.81       | -4.97       | -4.97        | -5.55       | -7.04      |
|                  | IC50                      | 2.45E-05  | 9.03E-06     | 1.57E-05    | 1.08E-05    | 1.07E-05     | 2.84E-06    | 9.15E-08   |
|                  | Span                      | 1.06      | 1.02         | 1.05        | 1.01        | 0.91         | 0.43        | 0.15       |
| <b>YUMMER_P</b>  | Bottom                    | 0.41      | 0.43         | 0.45        | 0.48        | 0.43         | 0.21        | 0.17       |
|                  | Top                       | 1.08      | 1.10         | 1.12        | 1.11        | 0.97         | 0.73        | 0.59       |
|                  | LogIC50                   | -6.52     | -6.86        | -6.94       | -7.09       | -6.95        | -6.12       | -5.95      |
|                  | IC50                      | 3.05E-07  | 1.37E-07     | 1.14E-07    | 8.06E-08    | 1.11E-07     | 7.64E-07    | 1.12E-06   |
|                  | Span                      | 0.67      | 0.67         | 0.67        | 0.63        | 0.54         | 0.52        | 0.42       |
| <b>YUMMER_R</b>  | Bottom                    | 0.01      | 0.16         | 0.21        | 0.25        | 0.22         | 0.15        | 0.25       |
|                  | Top                       | 1.07      | 1.06         | 1.09        | 1.07        | 0.99         | 0.72        | 0.50       |
|                  | LogIC50                   | -5.20     | -5.52        | -5.57       | -5.61       | -5.59        | -5.53       | -5.32      |
|                  | IC50                      | 6.25E-06  | 3.01E-06     | 2.68E-06    | 2.49E-06    | 2.60E-06     | 2.94E-06    | 4.74E-06   |
|                  | Span                      | 1.07      | 0.90         | 0.88        | 0.82        | 0.78         | 0.56        | 0.25       |

## Supplementary Figure Legends

**Supplementary Figure S1: Resistant YUMM cells have increased surface area and Expression levels of Rho proteins.** **a:** Vem-sensitivity of parental BRAF<sup>V600E</sup> cell lines (YUMM1.7 and YUMMER) and BRAF<sup>Wildtype</sup> (YUMM4.1). Cells were treated with increasing concentrations of Vem for 72 hours in DMEM with 10% FBS. An ATP-based assay (see Materials and Methods) was used to calculate cell viability relative to DMSO-treated cells. **b:** The surface area of YUMM cells: Fixed cells were stained with vimentin, and the area was calculated using 40X objective microscopic images by ImageJ. \* $p < 0.05$ ; \*\*\*\* $p < 0.0001$ . **c-d:** Expression levels of Rho A (b) and Rho C proteins (c) were assessed by immunoblotting 30  $\mu$ g total protein of whole cell lysates and normalized to  $\beta$ -tubulin. The results represent the mean  $\pm$  SEM of four independent experiments. Graphs show normalized levels of Rho proteins of resistant cells calculated by ImageJ, and fold-change was calculated relative to YUMM1.7\_P cells.

**Supplementary Figure S2: Magnified Rhodamine phalloidin stained YUMM cells.** Fixed cells were stained with Rhodamine Phalloidin. Images represent 1.5X magnification of different actin rearrangements: **a:** Enrichment of actin stress fibers, **b-c:** Cells displayed with cortical actin and depleted of actin stress fibers.

**Supplementary Figure S3: Nuclear enrichment of MRTF-A.** Western blot analysis of MRTF-A cytoplasmic fraction (C) and nuclear fraction (N) of indicated cell lines; P, parental; R, resistant. About 20  $\mu$ g protein was loaded for each fraction.  $\beta$ -tubulin served as a cytoplasmic marker; histone H3 was used as a nuclear marker.

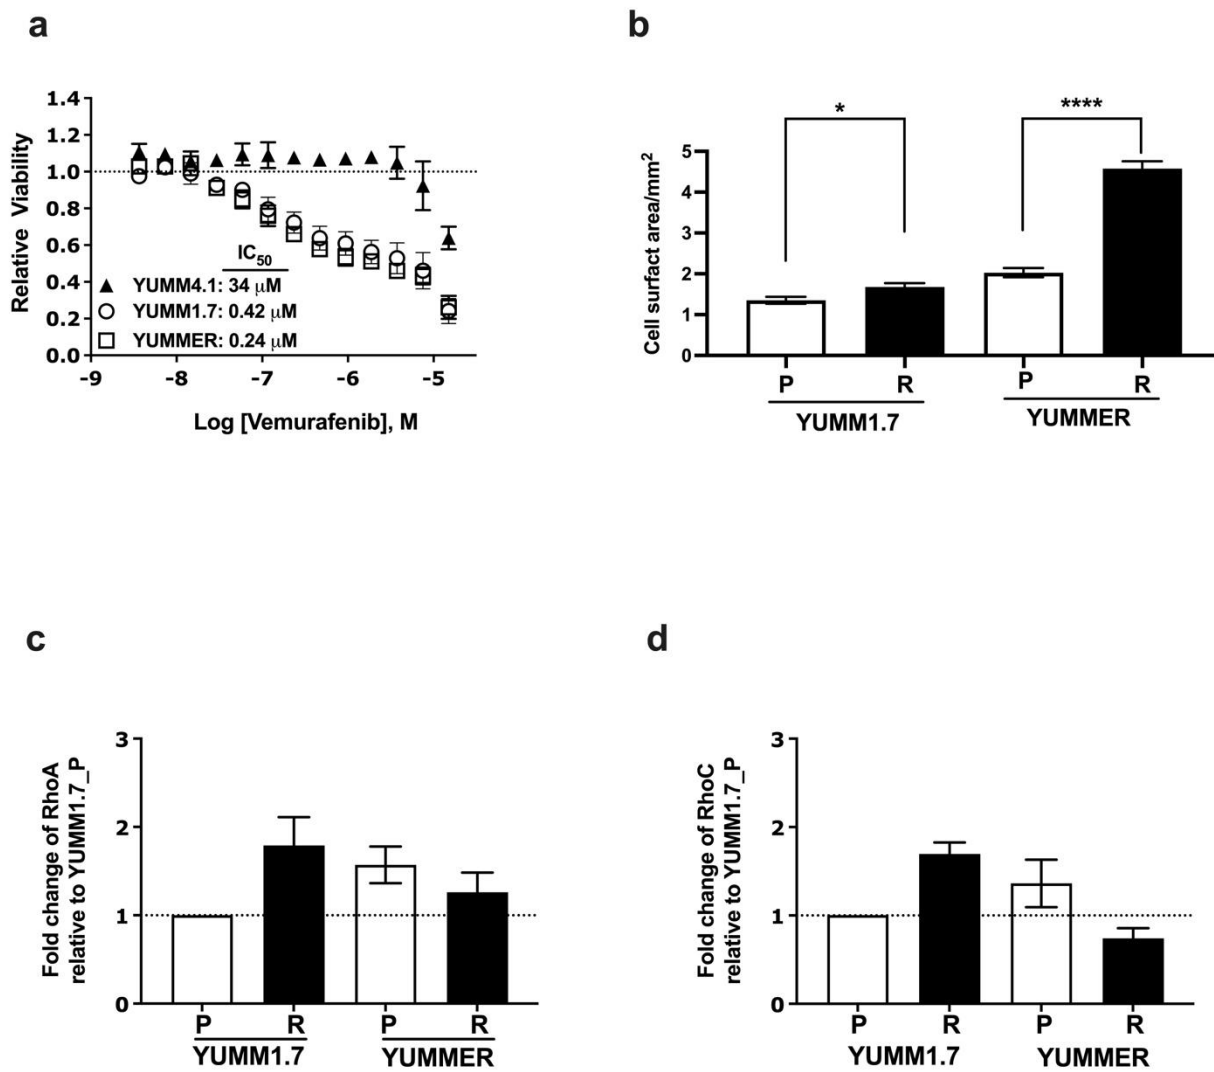

Supplementary Figure S1

**a**

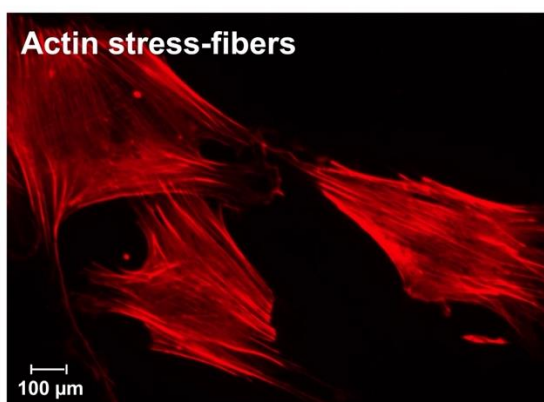

**b**

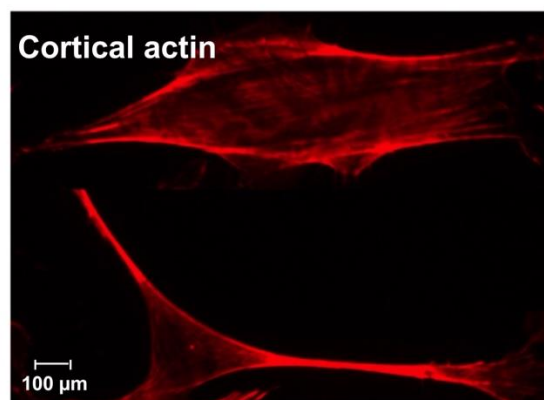

**c**

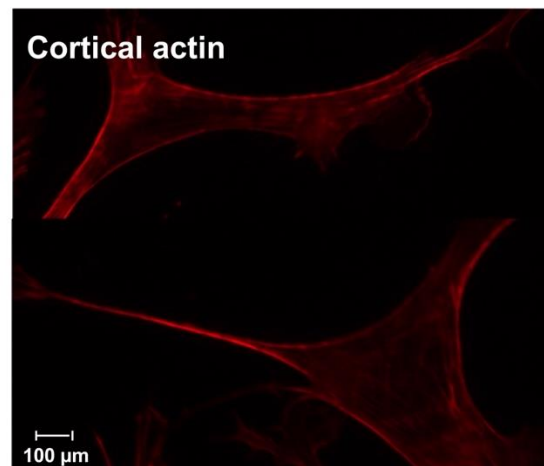

Supplementary Figure S2

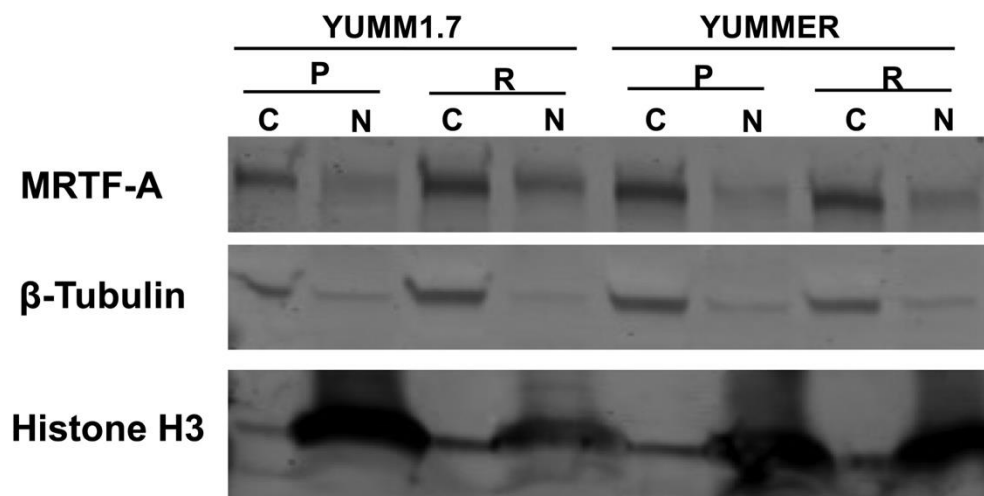

Supplementary Figure S3
